# Supplementary material
Source: ML conference proceedings conference paper supplement (https://aclanthology.org/D19-5805)
Supplement: Attachment [file (Appendix)Answer_Supervised_Question_Reformulation_for_Enhancing_Conversational_Machine_Comprehension_MRQA_.pdf › (Appendix)Answer_Supervised_Question_Reformulation_for_Enhancing_Conversational_Machine_Comprehension_MRQA_.pdf]

|                                   |                                                                                                                                                                                                                                                        |                                      |
|-----------------------------------|--------------------------------------------------------------------------------------------------------------------------------------------------------------------------------------------------------------------------------------------------------|--------------------------------------|
| <b>Title:</b> Personal life       |                                                                                                                                                                                                                                                        |                                      |
| Ori<br>Ptr-Copy<br>ASQR<br>Answer | Did Pepys have a wife<br>Did Pepys have a wife<br>Did Pepys have a wife<br>He and his wife took flageolet lessons                                                                                                                                      | original<br>original                 |
| Ori<br>Ptr-Copy<br>ASQR<br>Answer | Does he have any children<br>Does Pepys have any children<br>Does Pepys have any children<br>CANNOTANSWER                                                                                                                                              | reformulation<br>reformulation       |
| Ori<br>Ptr-Copy<br>ASQR<br>Answer | What did he do in his personal life<br>What did Pepys do in his personal life<br>What did Pepys do in his personal life<br>He liked wine, plays, and the company of other people. He also spent time evaluating his fortune and his place in the world | reformulation<br>reformulation       |
| Ori<br>Ptr-Copy<br>ASQR<br>Answer | Was he a business man<br>Was he a business man<br>Was Pepys a business man<br>Pepys was one of the most important civil servants of his age, and was also                                                                                              | no reformulation<br>reformulation    |
| Ori<br>Ptr-Copy<br>ASQR<br>Answer | What was he also<br>What was he also in the world<br>What was Pepys also except a business man<br>A widely cultivated man, taking an interest in books, music, the theatre and science. He was passionately interested in                              | error information<br>reformulation   |
| Ori<br>Ptr-Copy<br>ASQR<br>Answer | Did he have any other interest<br>Did he have any other interest<br>Did Pepys have any other interest<br>He also taught his wife to sing and paid for dancing lessons for her (although these stopped when                                             | no reformulation<br>reformulation    |
| Ori<br>Ptr-Copy<br>ASQR<br>Answer | What else is notable about his personal life<br>What else is notable about his personal life<br>What else is notable about his personal life<br>Pepys was known to be brutal to his servants                                                           | no reformulation<br>no reformulation |
| Ori<br>Ptr-Copy<br>ASQR<br>Answer | Did he beat them<br>Did he beat the dancing master<br>Did Pepys beat servants<br>Once beating a servant Jane with a broom until she cried                                                                                                              | error information<br>reformulation   |

Table 1: Examples of reformulation data. The first three lines of each group are the questions and the last one is the answer. The 'Ori' is the question in official QuAC data, the 'Ptr-copy' represents the question reformulated by Ptr-copy model, and the 'ASQR' represents the question reformulated by ASQR model. The third column marks the quality of the reformulation, where the 'original' means to retain the original information, the 'reformation' means successful rewriting and the 'error information' means to introduce error information. Compared with original questions, the questions reformulated by our ASQR model carry more critical information. Compared with Ptr-copy model, our ASQR model can obtain more accurate questions and introduce fewer error information.
